# Supplementary material
Source: MDPI journal article supplement (https://www.mdpi.com/2076-3298/9/4/41)
Supplement: s1 [file s1]

**Table S1.** TWQI data input and results (Ma. = Macroalgae, A.A. = Aquatic angiosperms).

|        |                      |                                |                            | measured variables |           |        |                      |       |         | Quality Values |             |          |                         |       |         | QV x w <sub>f</sub> |             |            |                           |            |             | TWQI  |      |
|--------|----------------------|--------------------------------|----------------------------|--------------------|-----------|--------|----------------------|-------|---------|----------------|-------------|----------|-------------------------|-------|---------|---------------------|-------------|------------|---------------------------|------------|-------------|-------|------|
| Region | TWQI - sample (year) | station code<br>(water sample) | station code MaQI (sample) | DO %SAT            | Chla µg/L | DIN µM | P-PO <sub>4</sub> µM | Ma %  | A. A. % | QVDO %SAT      | QVChla µg/L | QVDIN µM | QV P-PO <sub>4</sub> µM | QVMa  | QV A.A. | QVDO*0.15           | QVChla*0.15 | QVDIN*0.12 | QVP-PO <sub>4</sub> *0.12 | QV_Ma*0.23 | QVA.A.*0.23 | score |      |
| ER     | 2015                 | IT0899400100                   | IT0899400100               | 88.3               | 57.7      | 4.0    | 0.8                  | 7.5   | 0.0     | 85.9           | 0.0         | 92.0     | 73.6                    | 77.4  | 0.0     | 12.9                | 0.0         | 11.0       | 8.8                       | 17.8       | 0.0         | 50.6  |      |
| ER     | 2015                 | IT0899600100                   | IT0899600100               | 91.7               | 9.4       | 17.9   | 0.3                  | 70.0  | 0.0     | 90.0           | 77.3        | 64.2     | 90.9                    | 2.0   | 0.0     | 13.5                | 11.6        | 7.7        | 10.9                      | 0.5        | 0.0         | 44.2  |      |
| ER     | 2015                 | IT0899600300                   | IT0899600300               | 121.2              | 9.8       | 127.4  | 2.0                  | 70.0  | 0.0     | 99.9           | 74.5        | 0.0      | 41.9                    | 2.0   | 0.0     | 15.0                | 11.2        | 0.0        | 5.0                       | 0.5        | 0.0         | 31.7  |      |
| ER     | 2015                 | IT0899600500                   | IT0899600500               | 83.4               | 4.7       | 21.7   | 0.3                  | 20.0  | 0.0     | 80.1           | 100.0       | 57.5     | 90.9                    | 50.0  | 0.0     | 12.0                | 15.0        | 6.9        | 10.9                      | 11.5       | 0.0         | 56.3  |      |
| ER     | 2015                 | IT0899100100                   | IT0899100100               | 72.8               | 12.2      | 68.8   | 1.1                  | 2.5   | 0.0     | 66.4           | 59.0        | 15.6     | 62.1                    | 92.5  | 0.0     | 10.0                | 8.9         | 1.9        | 7.4                       | 21.3       | 0.0         | 49.4  |      |
| ER     | 2015                 | IT0899100201                   | IT0899100201               | 115.0              | 2.9       | 34.2   | 0.4                  | 100.0 | 0.0     | 99.9           | 100.0       | 40.8     | 86.0                    | 0.0   | 0.0     | 15.0                | 15.0        | 4.9        | 10.3                      | 0.0        | 0.0         | 45.2  |      |
| ER     | 2015                 | IT0899100300                   | IT0899100300               | 92.3               | 11.2      | 72.7   | 0.4                  | 100.0 | 0.0     | 90.7           | 65.2        | 13.6     | 87.6                    | 0.0   | 0.0     | 13.6                | 9.8         | 1.6        | 10.5                      | 0.0        | 0.0         | 35.5  |      |
| ER     | 2015                 | IT0899100401                   | IT0899100401               | 102.3              | 7.0       | 29.0   | 0.5                  | 75.0  | 0.0     | 100.0          | 93.5        | 46.5     | 83.6                    | 1.5   | 0.0     | 15.0                | 14.0        | 5.6        | 10.0                      | 0.3        | 0.0         | 45.0  |      |
| ER     | 2015                 | IT0899200100                   | IT0899200100               | 85.8               | 8.2       | 13.3   | 0.3                  | 75.0  | 6.3     | 82.9           | 85.5        | 73.3     | 89.8                    | 1.5   | 9.4     | 12.4                | 12.8        | 8.8        | 10.8                      | 0.3        | 2.2         | 47.3  |      |
| ER     | 2015                 | IT0899300101                   | IT0899300101               | 84.8               | 8.7       | 19.7   | 0.3                  | 70.0  | 0.0     | 81.7           | 82.2        | 60.5     | 90.6                    | 2.0   | 0.0     | 12.3                | 12.3        | 7.3        | 10.9                      | 0.5        | 0.0         | 43.2  |      |
| ER     | 2015                 | IT0899500200                   | IT0899500200               | 128.8              | 81.1      | 4.5    | 0.2                  | 0.0   | 0.0     | 98.4           | 0.0         | 91.0     | 94.7                    | 100.0 | 0.0     | 14.8                | 0.0         | 10.9       | 11.4                      | 23.0       | 0.0         | 60.0  |      |
| ER     | 2015                 | IT0899500300                   | IT0899500300               | 118.3              | 77.1      | 7.2    | 0.3                  | 0.0   | 0.0     | 99.9           | 0.0         | 85.6     | 90.3                    | 100.0 | 0.0     | 15.0                | 0.0         | 10.3       | 10.8                      | 23.0       | 0.0         | 59.1  |      |
| ER     | 2015                 | IT0899500400                   | IT0899500400               | 132.5              | 77.2      | 7.4    | 0.2                  | 0.0   | 0.0     | 96.9           | 0.0         | 85.1     | 93.0                    | 100.0 | 0.0     | 14.5                | 0.0         | 10.2       | 11.2                      | 23.0       | 0.0         | 58.9  |      |
| ER     | 2015                 | IT0899500500                   | IT0899500500               | 107.3              | 31.2      | 8.4    | 0.2                  | 0.0   | 0.0     | 100.0          | 0.0         | 83.3     | 92.2                    | 100.0 | 0.0     | 15.0                | 0.0         | 10.0       | 11.1                      | 23.0       | 0.0         | 59.1  |      |
| FVG    | 2015                 | FM 201                         | FM2_MF_201                 | 108.8              | 1.6       | 10.8   | 0.0                  | 90.0  | 0.0     | 100.0          | 100.0       | 78.3     | 98.4                    | 0.0   | 0.0     | 15.0                | 15.0        | 9.4        | 11.8                      | 0.0        | 0.0         | 51.2  |      |
| FVG    | 2015                 | FM 301                         | FM3_MF_003                 | 107.3              | 1.0       | 8.4    | 0.1                  | 76.7  | 45.8    | 100.0          | 100.0       | 83.3     | 97.8                    | 1.3   | 68.8    | 15.0                | 15.0        | 10.0       | 11.7                      | 0.3        | 15.8        | 67.8  |      |
| FVG    | 2015                 | FM 401                         | FM4_MF_004                 | 109.8              | 1.1       | 8.4    | 0.0                  | 40.0  | 75.0    | 100.0          | 100.0       | 83.1     | 98.8                    | 25.0  | 97.5    | 15.0                | 15.0        | 10.0       | 11.9                      | 5.8        | 22.4        | 80.0  |      |
| FVG    | 2015                 | TEU 101                        | TEU1_MF_005                | 104.9              | 0.9       | 7.4    | 0.0                  | 61.7  | 0.0     | 100.0          | 100.0       | 85.2     | 99.0                    | 4.5   | 0.0     | 15.0                | 15.0        | 10.2       | 11.9                      | 1.0        | 0.0         | 53.1  |      |
| FVG    | 2015                 | TEU 201                        | TEU2_MF_001                | 119.4              | 0.8       | 8.2    | 0.0                  | 90.0  | 75.0    | 99.9           | 100.0       | 83.6     | 98.7                    | 0.0   | 97.5    | 15.0                | 15.0        | 10.0       | 11.8                      | 0.0        | 22.4        | 74.3  |      |
| FVG    | 2015                 | TEU 301                        | TEU3_mf_004                | 106.9              | 0.9       | 8.2    | 0.0                  | 90.0  | 75.0    | 100.0          | 100.0       | 83.6     | 99.2                    | 0.0   | 97.5    | 15.0                | 15.0        | 10.0       | 11.9                      | 0.0        | 22.4        | 74.4  |      |
| FVG    | 2015                 | TEU 401                        | TEU4_MF_006                | 110.3              | 1.1       | 34.9   | 0.1                  | 70.0  | 50.0    | 100.0          | 100.0       | 40.1     | 96.7                    | 2.0   | 75.0    | 15.0                | 15.0        | 4.8        | 11.6                      | 0.5        | 17.3        | 64.1  |      |
| FVG    | 2015                 | TME 101                        | TME1_MF_001                | 94.9               | 1.8       | 49.0   | 0.0                  | 80.0  | 0.0     | 93.9           | 100.0       | 27.8     | 98.4                    | 1.0   | 0.0     | 14.1                | 15.0        | 3.3        | 11.8                      | 0.2        | 0.0         | 44.4  |      |
| FVG    | 2015                 | TME 102 (44)                   | TME1_MF_002                | 95.5               | 5.4       | 99.2   | 0.1                  | 100.0 | 0.0     | 94.6           | 100.0       | 0.4      | 96.1                    | 0.0   | 0.0     | 14.2                | 15.0        | 0.1        | 11.5                      | 0.0        | 0.0         | 40.8  |      |
| FVG    | 2015                 | TME 201                        | TME2_MF_002                | 89.5               | 1.9       | 52.4   | 0.2                  | 45.0  | 0.0     | 87.4           | 100.0       | 25.3     | 94.7                    | 20.0  | 0.0     | 13.1                | 15.0        | 3.0        | 11.4                      | 4.6        | 0.0         | 47.1  |      |
| FVG    | 2015                 | TME 301                        | TME3_MF_001                | 98.7               | 1.3       | 31.1   | 0.1                  | 90.0  | 0.0     | 98.4           | 100.0       | 43.9     | 97.7                    | 0.0   | 0.0     | 14.8                | 15.0        | 5.3        | 11.7                      | 0.0        | 0.0         | 46.8  |      |
| FVG    | 2015                 | TME 304                        | TME3_MF_004                | 95.9               | 0.7       | 74.6   | 0.4                  | 65.0  | 0.0     | 95.0           | 100.0       | 12.7     | 86.7                    | 3.5   | 0.0     | 14.3                | 15.0        | 1.5        | 10.4                      | 0.8        | 0.0         | 42.0  |      |
| FVG    | 2015                 | TME 401                        | TME4_MF_004                | 96.6               | 1.1       | 59.8   | 0.1                  | 40.0  | 0.0     | 95.9           | 100.0       | 20.2     | 95.1                    | 25.0  | 0.0     | 14.4                | 15.0        | 2.4        | 11.4                      | 5.8        | 0.0         | 49.0  |      |
| FVG    | 2015                 | TPO 101                        | TPO1_MF_001                | 106.9              | 0.9       | 7.5    | 0.1                  | 57.5  | 0.0     | 100.0          | 100.0       | 85.0     | 96.1                    | 7.5   | 0.0     | 15.0                | 15.0        | 10.2       | 11.5                      | 1.7        | 0.0         | 53.5  |      |
| FVG    | 2015                 | TPO 201                        | TPO2_MF_005                | 108.8              | 0.8       | 11.8   | 0.0                  | 55.0  | 37.5    | 100.0          | 100.0       | 76.3     | 99.6                    | 10.0  | 56.3    | 15.0                | 15.0        | 9.2        | 11.9                      | 2.3        | 12.9        | 66.3  |      |
| FVG    | 2015                 | TPO 204 (71)                   | TPO2_MF_007                | 105.2              | 0.9       | 12.0   | 0.1                  | 75.0  | 0.0     | 100.0          | 100.0       | 75.9     | 96.4                    | 1.5   | 0.0     | 15.0                | 15.0        | 9.1        | 11.6                      | 0.3        | 0.0         | 51.0  |      |
| FVG    | 2015                 | TPO 301                        | TPO3_MF_004                | 101.5              | 0.8       | 36.0   | 0.1                  | 70.0  | 0.0     | 100.0          | 100.0       | 39.0     | 97.6                    | 2.0   | 0.0     | 15.0                | 15.0        | 4.7        | 11.7                      | 0.5        | 0.0         | 46.8  |      |
| FVG    | 2015                 | TPO 401                        | TPO4_MF_003                | 105.7              | 1.2       | 44.2   | 0.1                  | 72.5  | 0.0     | 100.0          | 100.0       | 31.6     | 97.6                    | 1.8   | 0.0     | 15.0                | 15.0        | 3.8        | 11.7                      | 0.4        | 0.0         | 45.9  |      |
| FVG    | 2015                 | TPO 501                        | TPO5_MF_008                | 97.0               | 0.8       | 61.6   | 0.0                  | 90.0  | 0.0     | 96.4           | 100.0       | 19.2     | 98.4                    | 0.0   | 0.0     | 14.5                | 15.0        | 2.3        | 11.8                      | 0.0        | 0.0         | 43.6  |      |
| PU     | 2015                 | AT_PC01                        | AT_PC01_R1                 | 87.1               | 0.5       | 30.4   | 0.3                  | 2.5   | 47.5    | 84.5           | 100.0       | 44.6     | 90.5                    | 92.5  | 71.3    | 12.7                | 15.0        | 5.3        | 10.9                      | 21.3       | 16.4        | 81.5  |      |
| PU     | 2015                 | AT_CE01                        | AT_CE01_R1                 | 88.9               | 4.6       | 6.8    | 0.2                  | 45.0  | 42.5    | 86.7           | 100.0       | 86.5     | 91.7                    | 20.0  | 63.8    | 13.0                | 15.0        | 10.4       | 11.0                      | 4.6        | 14.7        | 68.7  |      |
| PU     | 2015                 | AT_VA01                        | AT_VA01_R1                 | 104.4              | 4.9       | 12.1   | 0.1                  | 32.5  | 32.5    | 100.0          | 100.0       | 75.8     | 96.7                    | 32.5  | 48.8    | 15.0                | 15.0        | 9.1        | 11.6                      | 7.5        | 11.2        | 69.4  |      |
| PU     | 2015                 | AT_VA02                        | AT_VA02_R1                 | 102.3              | 3.6       | 15.4   | 0.1                  | 10.0  | 0.0     | 100.0          | 100.0       | 69.2     | 95.2                    | 70.0  | 0.0     | 15.0                | 15.0        | 8.3        | 11.4                      | 16.1       | 0.0         | 65.8  |      |
| PU     | 2015                 | AT_LE01                        | AT_LE01_R1                 | 99.2               | 1.3       | 18.7   | 0.1                  | 2.5   | 0.0     | 99.0           | 100.0       | 62.7     | 95.6                    | 92.5  | 0.0     | 14.9                | 15.0        | 7.5        | 11.5                      | 21.3       | 0.0         | 70.1  |      |
| PU     | 2015                 | AT_LE02                        | AT_LE02_R1                 | 88.4               | 1.1       | 9.3    | 0.1                  | 15.0  | 57.5    | 86.1           | 100.0       | 81.3     | 96.4                    | 60.0  | 82.5    | 12.9                | 15.0        | 9.8        | 11.6                      | 13.8       | 19.0        | 82.0  |      |
| PU     | 2015                 | AT_LE03                        | AT_LE03_R1                 | 111.2              | 1.5       | 19.7   | 0.1                  | 12.5  | 15.0    | 100.0          | 100.0       | 60.6     | 96.4                    | 65.0  | 22.5    | 15.0                | 15.0        | 7.3        | 11.6                      | 15.0       | 5.2         | 69.0  |      |
| PU     | 2015                 | AT_MP01                        | AT_MP01_R1                 | 99.0               | 1.0       | 18.6   | 0.2                  | 45.0  | 0.0     | 98.7           | 100.0       | 62.8     | 92.0                    | 20.0  | 0.0     | 14.8                | 15.0        | 7.5        | 11.0                      | 4.6        | 0.0         | 53.0  |      |
| PU     | 2015                 | AT_MP02                        | AT_MP02_R1                 | 106.5              | 2.3       | 22.3   | 0.2                  | 42.5  | 0.0     | 100.0          | 100.0       | 56.6     | 92.0                    | 22.5  | 0.0     | 15.0                | 15.0        | 6.8        | 11.0                      | 5.2        | 0.0         | 53.0  |      |
| PU     | 2015                 | AT_PU01                        | AT_PU01_R1                 | 99.9               | 0.4       | 11.3   | 1.2                  | 2.5   | 67.5    | 99.9           | 100.0       | 77.3     | 59.1                    | 92.5  | 92.5    | 15.0                | 15.0        | 9.3        | 7.1                       | 21.3       | 21.3        | 88.9  |      |
| PU     | 2015                 | AT_TG01                        | AT_TG01_R1                 | 86.4               | 0.7       | 22.4   | 0.5                  | 17.5  | 0.0     | 83.7           | 100.0       | 56.4     | 83.6                    | 55.0  | 0.0     | 12.6                | 15.0        | 6.8        | 10.0                      | 12.7       | 0.0         | 57.0  |      |
| PU     | 2015                 | AT_LS01                        | AT_LS01_R1                 | 113.3              | 0.5       | 21.6   | 0.4                  | 60.0  | 70.0    | 99.9           | 100.0       | 57.6     | 86.5                    | 5.0   | 95.0    | 15.0                | 15.0        | 6.9        | 10.4                      | 1.2        | 21.9        | 70.3  |      |
| SARD   | 2018                 | 0035-AT50060-0041              | 0035-AT50060-0041          | 100.7              | 13.6      | 0.8    | 0.4                  | 100.0 | 50.0    | 100.0          | 100.0       | 52.1     | 98.4                    | 85.5  | 0.0     | 75.0                | 15.0        | 7.8        | 11.8                      | 10.3       | 22.3        | 0.2   | 67.4 |
| SARD   | 2018                 | 0035-AT50060-0075              | 0035-AT50060-0075          | 100.7              | 14.2      | 0.9    | 0.4                  | 75.0  | 50.0    | 100.0          | 100.0       | 49.1     | 98.3                    | 86.6  | 1.5     | 75.0                | 15.0        | 7.4        | 11.8                      | 10.4       | 22.5        | 0.2   | 67.2 |
| SARD   | 2018                 | 0036-AT50070-0094              | 0036-AT50070-0094          | 84.8               | 11.4      | 6.5    | 0.5                  | 100.0 | 100.0   | 81.8           | 64.0        | 87.1     | 82.3                    |       |         |                     |             |            |                           |            |             |       |      |

|        |      |                   |                   |       |       |      |     |       |       |       |       |      |      |       |       |      |      |      |      |      |      |      |
|--------|------|-------------------|-------------------|-------|-------|------|-----|-------|-------|-------|-------|------|------|-------|-------|------|------|------|------|------|------|------|
| SARD   | 2018 | 0128-AT50300-0029 | 0128-AT50300-0029 | 97.4  | 7.6   | 3.5  | 0.6 | 90.0  | 31.0  | 96.9  | 89.5  | 93.0 | 81.4 | 0.0   | 46.5  | 14.5 | 13.4 | 11.2 | 9.8  | 22.4 | 0.1  | 71.4 |
| SARD   | 2018 | 0129-AT50310-0020 | 0129-AT50310-0020 | 97.9  | 9.7   | 2.5  | 0.2 | 100.0 | 80.0  | 97.5  | 75.4  | 95.0 | 94.6 | 0.0   | 100.0 | 14.6 | 11.3 | 11.4 | 11.4 | 22.3 | 0.3  | 71.3 |
| SARD   | 2018 | 0142-AT50320-0013 | 0142-AT50320-0013 | 114.5 | 3.7   | 2.5  | 0.3 | 20.0  | 100.0 | 99.9  | 100.0 | 94.9 | 91.0 | 50.0  | 100.0 | 15.0 | 15.0 | 11.4 | 10.9 | 22.9 | 0.3  | 75.5 |
| SARD   | 2018 | 0158-AT50330-0009 | 0158-AT50330-0009 | 95.0  | 15.6  | 22.6 | 2.8 | 0.0   | 0.0   | 94.0  | 42.0  | 56.0 | 29.9 | 100.0 | 0.0   | 14.1 | 6.3  | 6.7  | 3.6  | 23.0 | 0.0  | 53.7 |
| SARD   | 2018 | 0184-AT50360-0032 | 0184-AT50360-0032 | 72.8  | 123.6 | 1.5  | 0.4 | 30.0  | 0.0   | 66.5  | 0.0   | 97.0 | 86.0 | 35.0  | 0.0   | 10.0 | 0.0  | 11.6 | 10.3 | 22.8 | 0.0  | 54.7 |
| SARD   | 2018 | 0190-AT50390-0007 | 0190-AT50390-0007 | 121.1 | 18.9  | 10.7 | 2.0 | 40.0  | 0.0   | 99.9  | 27.2  | 78.7 | 40.9 | 25.0  | 0.0   | 15.0 | 4.1  | 9.4  | 4.9  | 22.7 | 0.0  | 56.1 |
| SARD   | 2018 | 0190-AT50390-0089 | 0190-AT50390-0089 | 107.1 | 10.5  | 16.4 | 4.8 | 80.0  | 0.0   | 100.0 | 70.3  | 67.3 | 10.3 | 1.0   | 0.0   | 15.0 | 10.5 | 8.1  | 1.2  | 22.4 | 0.0  | 57.3 |
| SARD   | 2018 | 0221-AT50490-0049 | 0221-AT50490-0049 | 87.4  | 4.5   | 1.8  | 0.3 | 100.0 | 100.0 | 84.9  | 100.0 | 96.3 | 90.5 | 0.0   | 100.0 | 12.7 | 15.0 | 11.6 | 10.9 | 22.3 | 0.3  | 72.8 |
| SARD   | 2018 | 0221-AT50490-0176 | 0221-AT50490-0176 | 92.6  | 6.2   | 5.6  | 0.3 | 50.0  | 30.0  | 91.1  | 98.7  | 88.8 | 90.3 | 15.0  | 45.0  | 13.7 | 14.8 | 10.7 | 10.8 | 22.7 | 0.1  | 72.7 |
| SARD   | 2018 | 0225-AT50500-0037 | 0225-AT50500-0037 | 106.5 | 39.9  | 1.5  | 1.9 | 50.0  | 80.0  | 100.0 | 0.0   | 97.1 | 42.7 | 15.0  | 100.0 | 15.0 | 0.0  | 11.7 | 5.1  | 22.7 | 0.3  | 54.7 |
| SARD   | 2018 | 0226-AT50550-0041 | 0226-AT50550-0041 | 80.4  | 21.5  | 28.0 | 4.5 | 90.0  | 0.0   | 76.5  | 18.5  | 48.0 | 12.6 | 0.0   | 0.0   | 11.5 | 2.8  | 5.8  | 1.5  | 22.4 | 0.0  | 43.9 |
| SARD   | 2018 | 0226-AT50550-0069 | 0226-AT50550-0069 | 72.6  | 52.5  | 35.0 | 5.6 | 20.0  | 0.0   | 66.2  | 0.0   | 40.0 | 3.3  | 50.0  | 0.0   | 9.9  | 0.0  | 4.8  | 0.4  | 22.9 | 0.0  | 38.0 |
| SARD   | 2018 | 0226-AT50570-0012 | 0226-AT50570-0012 | 90.4  | 8.5   | 2.6  | 1.2 | 90.0  | 20.0  | 88.5  | 83.4  | 94.8 | 59.6 | 0.0   | 30.0  | 13.3 | 12.5 | 11.4 | 7.1  | 22.4 | 0.1  | 66.8 |
| SARD   | 2018 | 0226-AT50580-0002 | 0226-AT50580-0002 | 96.3  | 7.2   | 7.7  | 1.6 | 100.0 | 100.0 | 95.6  | 91.7  | 84.5 | 50.1 | 0.0   | 100.0 | 14.3 | 13.8 | 10.1 | 6.0  | 22.3 | 0.3  | 66.9 |
| SARD   | 2018 | 0226-AT50590-0004 | 0226-AT50590-0004 | 109.1 | 25.9  | 19.4 | 1.8 | 60.0  | 250.0 | 100.0 | 6.8   | 61.3 | 45.2 | 5.0   | 0.0   | 15.0 | 1.0  | 7.4  | 5.4  | 22.6 | 0.9  | 52.2 |
| SARD   | 2018 | 0226-AT50600-0097 | 0226-AT50600-0097 | 93.1  | 16.8  | 21.8 | 7.4 | 100.0 | 0.0   | 91.7  | 35.9  | 57.3 | 0.0  | 0.0   | 0.0   | 13.8 | 5.4  | 6.9  | 0.0  | 22.3 | 0.0  | 48.3 |
| SARD   | 2018 | 0226-AT50610-0202 | 0226-AT50610-0202 | 110.8 | 35.1  | 30.7 | 8.7 | 100.0 | 0.0   | 100.0 | 0.0   | 44.3 | 0.0  | 0.0   | 0.0   | 15.0 | 0.0  | 5.3  | 0.0  | 22.3 | 0.0  | 42.6 |
| SARD   | 2018 | 0252-AT50650-0146 | 0252-AT50650-0146 | 88.8  | 7.9   | 9.1  | 0.3 | 80.0  | 95.0  | 86.5  | 87.2  | 81.9 | 91.7 | 1.0   | 100.0 | 13.0 | 13.1 | 9.8  | 11.0 | 22.4 | 0.3  | 69.7 |
| SARD   | 2018 | 0257-AT50740-0120 | 0257-AT50740-0120 | 82.9  | 7.1   | 26.6 | 0.2 | 50.0  | 60.0  | 79.5  | 93.0  | 50.0 | 94.6 | 15.0  | 85.0  | 11.9 | 13.9 | 6.0  | 11.4 | 22.7 | 0.2  | 66.1 |
| SARD   | 2018 | 0258-AT50760-0007 | 0258-AT50760-0007 | 91.8  | 5.9   | 1.4  | 0.2 | 100.0 | 30.0  | 90.2  | 100.0 | 97.2 | 94.6 | 0.0   | 45.0  | 13.5 | 15.0 | 11.7 | 11.4 | 22.3 | 0.1  | 74.0 |
| SARD   | 2018 | 0259-AT50780-0010 | 0259-AT50780-0010 | 83.0  | 21.3  | 1.1  | 0.3 | 60.0  | 60.0  | 79.5  | 19.0  | 97.9 | 89.2 | 5.0   | 85.0  | 11.9 | 2.8  | 11.7 | 10.7 | 22.6 | 0.2  | 60.0 |
| SARD   | 2018 | 0287-AT50830-0009 | 0287-AT50830-0009 | 125.7 | 13.9  | 7.3  | 0.6 | 50.0  | 100.0 | 99.6  | 50.3  | 85.3 | 79.3 | 15.0  | 100.0 | 14.9 | 7.5  | 10.2 | 9.5  | 22.7 | 0.3  | 65.2 |
| SARD   | 2018 | 0287-AT50830-0032 | 0287-AT50830-0032 | 119.4 | 5.9   | 6.3  | 0.6 | 100.0 | 100.0 | 99.9  | 100.0 | 87.3 | 80.9 | 0.0   | 100.0 | 15.0 | 15.0 | 10.5 | 9.7  | 22.3 | 0.3  | 72.8 |
| SARD   | 2018 | 0301-AT50870-0047 | 0301-AT50870-0047 | 90.0  | 55.4  | 45.1 | 0.4 | 80.0  | 0.0   | 88.0  | 0.0   | 30.9 | 87.4 | 1.0   | 0.0   | 13.2 | 0.0  | 3.7  | 10.5 | 22.4 | 0.0  | 49.8 |
| VENETO | 2014 | 260               | 263               | 126.8 | 3.7   | 22.6 | 0.3 | 100.0 | 0.0   | 99.2  | 100.0 | 56.1 | 90.6 | 0.0   | 0.0   | 14.9 | 15.0 | 6.7  | 10.9 | 0.0  | 0.0  | 47.5 |
| VENETO | 2014 | 270               | 273               | 102.3 | 1.4   | 43.2 | 0.5 | 32.5  | 0.0   | 100.0 | 100.0 | 32.4 | 84.5 | 32.5  | 0.0   | 15.0 | 15.0 | 3.9  | 10.1 | 7.5  | 0.0  | 51.5 |
| VENETO | 2014 | 390               | 393               | 100.7 | 2.4   | 61.0 | 0.3 | 0.0   | 30.0  | 100.0 | 100.0 | 19.5 | 89.3 | 100.0 | 45.0  | 15.0 | 15.0 | 2.3  | 10.7 | 23.0 | 10.4 | 76.4 |
| VENETO | 2014 | 210               | 213               | 109.4 | 8.0   | 19.5 | 0.2 | 100.0 | 0.0   | 100.0 | 87.0  | 61.0 | 93.7 | 0.0   | 0.0   | 15.0 | 13.0 | 7.3  | 11.2 | 0.0  | 0.0  | 46.6 |
| VENETO | 2014 | 220               | 223               | 111.6 | 2.4   | 9.5  | 0.2 | 45.0  | 0.0   | 100.0 | 100.0 | 81.0 | 94.5 | 20.0  | 0.0   | 15.0 | 15.0 | 9.7  | 11.3 | 4.6  | 0.0  | 55.7 |
| VENETO | 2014 | 400               | 403               | 96.8  | 2.9   | 8.5  | 0.2 | 65.0  | 0.0   | 96.1  | 100.0 | 83.0 | 94.9 | 3.5   | 0.0   | 14.4 | 15.0 | 10.0 | 11.4 | 0.8  | 0.0  | 51.6 |
| VENETO | 2014 | 290               | 293               | 109.2 | 2.9   | 68.3 | 0.8 | 10.0  | 0.0   | 100.0 | 100.0 | 15.8 | 72.2 | 70.0  | 0.0   | 15.0 | 15.0 | 1.9  | 8.7  | 16.1 | 0.0  | 56.7 |
| VENETO | 2014 | 430               | 433               | 145.5 | 11.5  | 29.5 | 0.4 | 100.0 | 0.0   | 91.8  | 63.6  | 45.8 | 86.5 | 0.0   | 0.0   | 13.8 | 9.5  | 5.5  | 10.4 | 0.0  | 0.0  | 39.2 |
| VENETO | 2014 | 440               | 443               | 108.7 | 2.9   | 56.2 | 0.7 | 100.0 | 0.0   | 100.0 | 100.0 | 22.7 | 77.7 | 0.0   | 0.0   | 15.0 | 15.0 | 2.7  | 9.3  | 0.0  | 0.0  | 42.0 |
| VENETO | 2014 | 380               | 383               | 95.5  | 1.4   | 95.8 | 0.4 | 4.0   | 0.0   | 94.7  | 100.0 | 2.1  | 86.8 | 88.0  | 0.0   | 14.2 | 15.0 | 0.3  | 10.4 | 20.2 | 0.0  | 60.1 |
| VENETO | 2014 | EC_1              | EC_1              | 113.2 | 2.4   | 11.4 | 0.1 | 52.5  | 32.5  | 99.9  | 100.0 | 77.2 | 96.3 | 12.5  | 48.8  | 15.0 | 15.0 | 9.3  | 11.6 | 2.9  | 11.2 | 64.9 |
| VENETO | 2014 | EC_2              | EC_2              | 118.8 | 2.8   | 9.4  | 0.1 | 47.5  | 0.0   | 99.9  | 100.0 | 81.1 | 96.3 | 17.5  | 0.0   | 15.0 | 15.0 | 9.7  | 11.6 | 4.0  | 0.0  | 55.3 |
| VENETO | 2014 | EC_Ve-8           | EC_Ve-8           | 98.1  | 2.2   | 12.3 | 0.2 | 42.5  | 75.0  | 97.7  | 100.0 | 75.4 | 94.9 | 22.5  | 97.5  | 14.6 | 15.0 | 9.1  | 11.4 | 5.2  | 22.4 | 77.7 |
| VENETO | 2014 | ENC1_1            | ENC1_1            | 104.4 | 1.9   | 5.2  | 0.1 | 72.5  | 90.0  | 100.0 | 100.0 | 89.7 | 95.2 | 1.8   | 100.0 | 15.0 | 15.0 | 10.8 | 11.4 | 0.4  | 23.0 | 75.6 |
| VENETO | 2014 | ENC1_2            | ENC1_2            | 112.7 | 1.9   | 10.0 | 0.1 | 67.5  | 92.5  | 99.9  | 100.0 | 80.0 | 96.3 | 2.8   | 100.0 | 15.0 | 15.0 | 9.6  | 11.6 | 0.6  | 23.0 | 74.8 |
| VENETO | 2014 | ENC1_3            | ENC1_3            | 108.3 | 2.9   | 18.0 | 0.1 | 70.0  | 0.0   | 100.0 | 100.0 | 64.0 | 96.0 | 2.0   | 0.0   | 15.0 | 15.0 | 7.7  | 11.5 | 0.5  | 0.0  | 49.6 |
| VENETO | 2014 | ENC1_4            | ENC1_4            | 122.1 | 2.2   | 8.9  | 0.2 | 51.3  | 100.0 | 99.9  | 100.0 | 82.2 | 94.1 | 13.8  | 100.0 | 15.0 | 15.0 | 9.9  | 11.3 | 3.2  | 23.0 | 77.3 |
| VENETO | 2014 | ENC1_FI           | ENC1_FI           | 107.0 | 1.6   | 6.2  | 0.1 | 3.8   | 90.0  | 100.0 | 100.0 | 87.6 | 95.2 | 88.8  | 100.0 | 15.0 | 15.0 | 10.5 | 11.4 | 20.4 | 23.0 | 95.3 |
| VENETO | 2014 | ENC1_VS           | ENC1_VS           | 105.8 | 1.3   | 6.5  | 0.2 | 75.0  | 90.0  | 100.0 | 100.0 | 86.9 | 94.1 | 1.5   | 100.0 | 15.0 | 15.0 | 10.4 | 11.3 | 0.3  | 23.0 | 75.1 |
| VENETO | 2014 | ENC2_1            | ENC2_1            | 120.5 | 2.3   | 14.1 | 0.2 | 46.3  | 85.0  | 99.9  | 100.0 | 71.9 | 92.8 | 18.8  | 100.0 | 15.0 | 15.0 | 8.6  | 11.1 | 4.3  | 23.0 | 77.1 |
| VENETO | 2014 | ENC2_VG           | ENC2_VG           | 104.6 | 2.9   | 12.4 | 0.2 | 40.0  | 3.0   | 100.0 | 100.0 | 75.1 | 94.9 | 25.0  | 4.5   | 15.0 | 15.0 | 9.0  | 11.4 | 5.8  | 1.0  | 57.2 |
| VENETO | 2014 | ENC3_CH           | ENC3_CH           | 114.3 | 3.2   | 25.0 | 0.2 | 90.0  | 0.5   | 99.9  | 100.0 | 52.5 | 94.1 | 0.0   | 0.8   | 15.0 | 15.0 | 6.3  | 11.3 | 0.0  | 0.2  | 47.8 |
| VENETO | 2014 | ENC4_1            | ENC4_1            | 109.6 | 2.3   | 8.6  | 0.1 | 80.0  | 0.0   | 100.0 | 100.0 | 82.9 | 95.5 | 1.0   | 0.0   | 15.0 | 15.0 | 9.9  | 11.5 | 0.2  | 0.0  | 51.6 |
| VENETO | 2014 | ENC4_Ve-6         | ENC4_Ve-6         | 96.5  | 1.3   | 6.9  | 0.1 | 55.0  | 7.5   | 95.8  | 100.0 | 86.1 | 95.5 | 10.0  | 11.3  | 14.4 | 15.0 | 10.3 | 11.5 | 2.3  | 2.6  | 56.1 |
| VENETO | 2014 | 230               | 233               | 92.9  | 2.7   | 83.1 | 0.7 | 20.0  | 0.0   | 91.5  | 100.0 | 8.4  | 76.7 | 50.0  | 0.0   | 13.7 | 15.0 | 1.0  | 9.2  | 11.5 | 0.0  | 50.4 |
| VENETO | 2014 | 410               | 413               | 111.0 | 7.9   | 30.2 | 0.3 | 0.0   | 0.0   | 100.0 | 87.1  | 44.8 | 88.6 | 100.0 | 0.0   | 15.0 | 13.1 | 5.4  | 10.6 | 23.0 | 0.0  | 67.1 |
| VENETO | 2014 | PC1_1             | PC1_1             | 104.6 | 2.4   | 18.5 | 0.2 | 35.0  | 0.0   | 100.0 | 100.0 | 63.0 | 94.9 | 30.0  | 0.0   | 15.0 | 15.0 | 7.6  | 11.4 | 6.9  | 0.0  | 55.8 |
| VENETO | 2014 | PC1_1B            | PC1_1B            | 122.9 | 18.5  | 73.5 | 0.7 | 18.8  | 0.0   | 99.9  | 28.4  | 13.3 | 77.6 | 52.5  | 0.0   | 15.0 | 4.3  | 1.6  | 9.3  | 12.1 | 0.0  | 42.2 |
| VENETO | 2014 | PC1_2             | PC1_2             | 117.9 | 5.5   | 25.1 | 0.1 | 35.0  | 0.0   | 99.9  | 100.0 | 52.4 | 96.0 | 30.0  | 0.0   | 15.0 | 15.0 | 6.3  | 11.5 | 6.9  | 0.0  | 54.7 |
| VENETO | 2014 | PC2_1             | PC2_1             | 104.8 | 4.3   | 8.1  | 0.2 | 100.0 | 0.0   | 100.0 | 100.0 | 83.8 | 94.9 | 0.0   | 0.0   | 15.0 | 15.0 | 10.1 | 11.4 | 0.0  | 0.0  | 51.4 |
| VENETO | 2014 | PC2_16            | PC2_16            | 100.5 | 6.2   | 15.9 | 0.2 | 55.0  | 0.5   | 100.0 | 98.8  | 68.1 | 94.1 | 10.0  | 0.8   | 15.0 | 14.8 | 8.2  | 11.3 | 2.3  | 0.2  | 51.8 |
| VENETO | 2014 | PC2_CC            | PC2_CC            | 131.5 | 3.4   | 16.9 | 0.2 | 97.5  | 0.0   | 97.3  | 100.0 | 66.3 | 94.7 | 0.0   | 0.0   | 14.6 | 15.0 | 8.0  | 11.4 | 0.0  | 0.0  | 48.9 |
| VENETO | 2014 | PC3_VDB           | PC3_VDB           | 94.2  | 4.4   | 56.6 | 0.3 | 55.0  | 0.0   | 93.1  | 100.0 | 22.4 | 89.6 | 10.0  | 0.0   | 14.0 | 15.0 | 2.7  | 10.8 | 2.3  | 0.0  | 44.7 |
| VENETO | 2014 | PC4_10B           |                   |       |       |      |     |       |       |       |       |      |      |       |       |      |      |      |      |      |      |      |

|        |      |     |     |      |     |      |     |      |     |      |       |      |      |     |     |      |      |     |     |     |     |      |
|--------|------|-----|-----|------|-----|------|-----|------|-----|------|-------|------|------|-----|-----|------|------|-----|-----|-----|-----|------|
| VENETO | 2014 | 250 | 253 | 90.4 | 3.1 | 75.6 | 0.8 | 80.0 | 0.0 | 88.5 | 100.0 | 12.2 | 73.4 | 1.0 | 0.0 | 13.3 | 15.0 | 1.5 | 8.8 | 0.2 | 0.0 | 38.8 |
|--------|------|-----|-----|------|-----|------|-----|------|-----|------|-------|------|------|-----|-----|------|------|-----|-----|-----|-----|------|

Table S2. TWEAM data input and results (Ma. = Macroalgae, A.A.= Aquatic angiosperms).

| Region | period    | MaQI samples (year) | Salinity class | Salinity type | Compound / lagoon                                      | station code (water) | station code (MaQI) | LONG      | LAT       | DIN uM | RP uM | MaQI | TWQI | PHASE   | TWEAM |
|--------|-----------|---------------------|----------------|---------------|--------------------------------------------------------|----------------------|---------------------|-----------|-----------|--------|-------|------|------|---------|-------|
| ER     | 2014-2016 | 2015                | polyhaline     | <30           | C1 - Northern Adriatic Sea - Sacca di Goro             | 899100100            | 899100100           | 12.276800 | 44.822417 | 114.8  | 0.9   | 0.2  | 49.4 | phase 2 | E2    |
| ER     | 2014-2016 | 2015                | polyhaline     | <30           | C1 - Northern Adriatic Sea - Sacca di Goro             | 899100201            | 899100201           | 12.351767 | 44.795055 | 64.3   | 0.8   | 0.3  | 45.2 | phase 2 | E2    |
| ER     | 2014-2016 | 2015                | polyhaline     | <30           | C1 - Northern Adriatic Sea - Sacca di Goro             | 899100300            | 899100300           | 12.330500 | 44.817550 | 76.1   | 0.5   | 0.4  | 35.5 | phase 2 | E2    |
| ER     | 2014-2016 | 2015                | polyhaline     | <30           | C1 - Northern Adriatic Sea - Sacca di Goro             | 899100401            | 899100401           | 12.314533 | 44.793567 | 44.4   | 0.6   | 0.3  | 45.0 | phase 2 | E2    |
| ER     | 2014-2016 | 2015                | mesohaline     | <30           | C1 - Northern Adriatic Sea - Valle Cantone             | 899200100            | 899200100           | 12.195900 | 44.794417 | 12.2   | 0.4   | 0.6  | 47.3 | phase 2 | M     |
| ER     | 2014-2016 | 2015                | polyhaline     | <30           | C1 - Northern Adriatic Sea - Valle Nuova               | 899300101            | 899300101           | 12.208009 | 44.793064 | 17.5   | 0.2   | 0.4  | 43.2 | phase 2 | E2    |
| ER     | 2014-2016 | 2015                | polyhaline     | <30           | C1 - Northern Adriatic Sea - Lago delle Nazioni        | 899400100            | 899400100           | 12.251683 | 44.781600 | 6.8    | 0.9   | 0.3  | 50.6 | phase 2 | M     |
| ER     | 2014-2016 | 2015                | euhaline       | >30           | C1 - Northern Adriatic Sea - Valli di Comacchio        | 899500200            | 899500200           | 12.154383 | 44.641367 | 4.4    | 0.2   | 0.0  | 60.0 | phase 2 | M     |
| ER     | 2014-2016 | 2015                | euhaline       | >30           | C1 - Northern Adriatic Sea - Valli di Comacchio        | 899500300            | 899500300           | 12.170533 | 44.564300 | 4.2    | 0.2   | 0.0  | 59.1 | E1      | M     |
| ER     | 2014-2016 | 2015                | euhaline       | >30           | C1 - Northern Adriatic Sea - Valli di Comacchio        | 899500400            | 899500400           | 12.207517 | 44.599900 | 5.5    | 0.2   | 0.0  | 58.9 | E1      | M     |
| ER     | 2014-2016 | 2015                | euhaline       | >30           | C1 - Northern Adriatic Sea - Valli di Comacchio        | 899500500            | 899500500           | 12.226900 | 44.632517 | 13.8   | 0.2   | 0.0  | 59.1 | phase 2 | M     |
| ER     | 2014-2016 | 2015                | euhaline       | >30           | C1 - Northern Adriatic Sea - Pialassa Baiona           | 899600100            | 899600100           | 12.245443 | 44.489842 | 26.4   | 0.5   | 0.4  | 44.2 | phase 2 | E1    |
| ER     | 2014-2016 | 2015                | euhaline       | >30           | C1 - Northern Adriatic Sea - Pialassa Baiona           | 899600300            | 899600300           | 12.251384 | 44.480427 | 184.3  | 2.1   | 0.4  | 31.7 | phase 2 | E1    |
| ER     | 2014-2016 | 2015                | euhaline       | >30           | C1 - Northern Adriatic Sea - Pialassa Baiona           | 899600500            | 899600500           | 12.258104 | 44.519108 | 19.9   | 0.4   | 0.4  | 56.3 | phase 2 | M     |
| FVG    | 2014-2016 | 2015                | polyhaline     | <30           | C1 - Northern Adriatic Sea - Grado-Marano lagoon       | FM 201               | FM2_MF_201          | 13.417167 | 45.713600 | 19.1   | 0.1   | 0.3  | 51.2 | phase 2 | M     |
| FVG    | 2014-2016 | 2015                | euhaline       | >30           | C1 - Northern Adriatic Sea - Grado-Marano lagoon       | FM 301               | FM3_MF_003          | 13.406667 | 45.691350 | 12.7   | 0.1   | 0.9  | 67.8 | N1      | N1    |
| FVG    | 2014-2016 | 2015                | euhaline       | >30           | C1 - Northern Adriatic Sea - Grado-Marano lagoon       | FM 401               | FM4_MF_004          | 13.282783 | 45.712967 | 22.0   | 0.1   | 0.9  | 80.0 | phase 2 | N2    |
| FVG    | 2014-2016 | 2015                | euhaline       | >30           | C1 - Northern Adriatic Sea - Grado-Marano lagoon       | FEU 101              | FEU1_MF_005         | 13.354150 | 45.713833 | 13.4   | 0.1   | 0.3  | 53.1 | phase 2 | M     |
| FVG    | 2014-2016 | 2015                | euhaline       | >30           | C1 - Northern Adriatic Sea - Grado-Marano lagoon       | FEU 201              | FEU2_MF_001         | 13.331867 | 45.707100 | 19.5   | 0.1   | 0.9  | 74.3 | phase 2 | N2    |
| FVG    | 2014-2016 | 2015                | euhaline       | >30           | C1 - Northern Adriatic Sea - Grado-Marano lagoon       | FEU 301              | FEU3_MF_004         | 13.255583 | 45.732383 | 31.9   | 0.1   | 0.9  | 74.4 | phase 2 | N2    |
| FVG    | 2014-2016 | 2015                | euhaline       | >30           | C1 - Northern Adriatic Sea - Grado-Marano lagoon       | FEU 401              | FEU4_MF_006         | 13.220950 | 45.732250 | 43.6   | 0.1   | 0.9  | 64.1 | phase 2 | N2    |
| FVG    | 2014-2016 | 2015                | mesohaline     | <30           | C1 - Northern Adriatic Sea - Grado-Marano lagoon       | IME 101              | IME1_MF_001         | 13.186267 | 45.763083 | 59.4   | 0.1   | 0.3  | 44.4 | phase 2 | E2    |
| FVG    | 2014-2016 | 2015                | mesohaline     | <30           | C1 - Northern Adriatic Sea - Grado-Marano lagoon       | IME 102              | IME1_MF_002         | 13.216667 | 45.768900 | 163.8  | 0.2   | 0.3  | 40.8 | phase 2 | E2    |
| FVG    | 2014-2016 | 2015                | mesohaline     | <30           | C1 - Northern Adriatic Sea - Grado-Marano lagoon       | IME 201              | IME2_MF_002         | 13.126917 | 45.757983 | 97.5   | 0.2   | 0.4  | 47.1 | phase 2 | E2    |
| FVG    | 2014-2016 | 2015                | mesohaline     | <30           | C1 - Northern Adriatic Sea - Grado-Marano lagoon       | IME 301              | IME3_MF_001         | 13.120917 | 45.744867 | 95.9   | 0.2   | 0.4  | 46.8 | phase 2 | E2    |
| FVG    | 2014-2016 | 2015                | mesohaline     | <30           | C1 - Northern Adriatic Sea - Grado-Marano lagoon       | IME 304              | IME3_MF_004         | 13.097598 | 45.734263 | 144.9  | 0.4   | 0.4  | 42.0 | phase 2 | E2    |
| FVG    | 2014-2016 | 2015                | mesohaline     | <30           | C1 - Northern Adriatic Sea - Grado-Marano lagoon       | IME 401              | IME4_MF_004         | 13.085500 | 45.706717 | 79.9   | 0.2   | 0.4  | 49.0 | phase 2 | E2    |
| FVG    | 2014-2016 | 2015                | polyhaline     | <30           | C1 - Northern Adriatic Sea - Grado-Marano lagoon       | TPO 101              | TPO1_MF_001         | 13.374750 | 45.727550 | 21.0   | 0.2   | 0.3  | 53.5 | phase 2 | M     |
| FVG    | 2014-2016 | 2015                | polyhaline     | <30           | C1 - Northern Adriatic Sea - Grado-Marano lagoon       | TPO 201              | TPO2_MF_005         | 13.292733 | 45.738900 | 25.2   | 0.1   | 0.7  | 66.3 | N1      | N1    |
| FVG    | 2014-2016 | 2015                | polyhaline     | <30           | C1 - Northern Adriatic Sea - Grado-Marano lagoon       | TPO 204              | TPO2_MF_007         | 13.335633 | 45.727050 | 28.8   | 0.1   | 0.3  | 51.0 | phase 2 | M     |
| FVG    | 2014-2016 | 2015                | polyhaline     | <30           | C1 - Northern Adriatic Sea - Grado-Marano lagoon       | TPO 301              | TPO3_MF_004         | 13.171650 | 45.737250 | 45.6   | 0.1   | 0.6  | 46.8 | phase 2 | E2    |
| FVG    | 2014-2016 | 2015                | polyhaline     | <30           | C1 - Northern Adriatic Sea - Grado-Marano lagoon       | TPO 401              | TPO4_MF_003         | 13.130450 | 45.724983 | 50.1   | 0.1   | 0.4  | 45.9 | phase 2 | E2    |
| FVG    | 2014-2016 | 2015                | polyhaline     | <30           | C1 - Northern Adriatic Sea - Grado-Marano lagoon       | TPO 501              | TPO5_MF_008         | 13.108217 | 45.703533 | 66.5   | 0.1   | 0.3  | 43.6 | phase 2 | E2    |
| PU     | 2014-2016 | 2015                | mesohaline     | <30           | C2 - Apulian compound - Cesine                         | AT_CE01              | AT_CE01_R1          | 18.335861 | 40.359083 | 4.4    | 0.2   | 0.6  | 68.7 | phase 2 | N2    |
| PU     | 2014-2016 | 2015                | polyhaline     | <30           | C2 - Apulian compound - Lesina                         | AT_LE01              | AT_LE01_R1          | 15.346083 | 41.886639 | 18.8   | 0.1   | 0.2  | 70.1 | phase 2 | M     |
| PU     | 2014-2016 | 2015                | polyhaline     | <30           | C2 - Apulian compound - Lesina                         | AT_LE02              | AT_LE02_R1          | 15.440389 | 41.886694 | 14.7   | 0.2   | 0.7  | 82.0 | N1      | N1    |
| PU     | 2014-2016 | 2015                | polyhaline     | <30           | C2 - Apulian compound - Lesina                         | AT_LE03              | AT_LE03_R1          | 15.524256 | 41.907235 | 24.9   | 0.1   | 0.6  | 69.0 | phase 2 | N2    |
| PU     | 2014-2016 | 2015                | iperhaline     | >30           | C2 - Apulian compound - Vasche Evaporanti (Lago Salpi) | AT_LS01              | AT_LS01_R1          | 15.998123 | 41.424140 | 14.9   | 0.4   | 0.7  | 70.3 | N1      | N1    |
| PU     | 2014-2016 | 2015                | euhaline       | >30           | C2 - Apulian compound - Mar Piccolo di taranto         | AT_MP01              | AT_MP01_R1          | 17.258069 | 40.488700 | 17.3   | 0.3   | 0.4  | 53.0 | phase 2 | M     |
| PU     | 2014-2016 | 2015                | euhaline       | >30           | C2 - Apulian compound - Mar Piccolo di taranto         | AT_MP02              | AT_MP02_R1          | 17.308042 | 40.489492 | 17.6   | 0.3   | 0.4  | 53.0 | phase 2 | M     |
| PU     | 2014-2016 | 2015                | euhaline       | >30           | C2 - Apulian compound - Baia di Porto Cesareo          | AT_PC01              | AT_PC01_R1          | 17.904517 | 40.249088 | 31.6   | 0.2   | 0.9  | 81.5 | phase 2 | N2    |
| PU     | 2014-2016 | 2015                | iperhaline     | >30           | C2 - Apulian compound - Punta della Contessa           | AT_PU01              | AT_PU01_R1          | 18.041539 | 40.595027 | 14.9   | 1.2   | 0.7  | 88.9 | phase 2 | N2    |
| PU     | 2014-2016 | 2015                | mesohaline     | <30           | C2 - Apulian compound - Torre Guaceto                  | AT_TG01              | AT_TG01_R1          | 17.795464 | 40.714204 | 35.7   | 0.3   | 0.3  | 57.0 | phase 2 | M     |
| PU     | 2014-2016 | 2015                | polyhaline     | <30           | C2 - Apulian compound - Lago di Varano                 | AT_VA01              | AT_VA01_R1          | 15.686222 | 41.900722 | 9.4    | 0.1   | 0.9  | 69.4 | N1      | N1    |
| PU     | 2014-2016 | 2015                | polyhaline     | <30           | C2 - Apulian compound - Lago di Varano                 | AT_VA02              | AT_VA02_R1          | 15.797222 | 41.904778 | 11.6   | 0.2   | 0.9  | 65.8 | N1      | N1    |
| SARD   | 2016-2018 | 2018                | euhaline       | >30           | C3 -Sardinian compound                                 | 0035-AT50060-0041    | 0035-AT50060-0041   | 9.586521  | 39.334207 | 2.0    | 0.3   | 0.7  | 62.1 | N1      | N1    |
| SARD   | 2016-2018 | 2018                | euhaline       | >30           | C3 -Sardinian compound                                 | 0035-AT50060-0075    | 0035-AT50060-0075   | 9.590033  | 39.337794 | 2.7    | 0.3   | 0.9  | 62.0 | N1      | N1    |
| SARD   | 2016-2018 | 2018                | euhaline       | >30           | C3 -Sardinian compound                                 | 0036-AT50070-0094    | 0036-AT50070-0094   | 9.585542  | 39.355838 | 4.3    | 0.4   | 0.9  | 65.2 | N1      | N1    |
| SARD   | 2016-2018 | 2018                | polyhaline     | <30           | C3 -Sardinian compound                                 | 0040-AT50090-0073    | 0040-AT50090-0073   | 9.619973  | 39.443063 | 2.5    | 0.3   | 0.9  | 81.0 | N1      | N1    |
| SARD   | 2016-2018 | 2018                | euhaline       | >30           | C3 -Sardinian compound                                 | 0073-AT50110-0053    | 0073-AT50110-0053   | 9.672425  | 39.940132 | 8.9    | 0.2   | 0.9  | 63.4 | N1      | N1    |
| SARD   | 2016-2018 | 2018                | euhaline       | >30           | C3 -Sardinian compound                                 | 0073-AT50110-0105    | 0073-AT50110-0105   | 9.667778  | 39.943763 | 8.1    | 0.2   | 0.3  | 38.1 | phase 2 | E2    |
| SARD   | 2016-2018 | 2018                | polyhaline     | <30           | C3 -Sardinian compound                                 | 0101-AT50120-0025    | 0101-AT50120-0025   | 9.698665  | 40.356577 | 4.5    | 1.2   | 0.3  | 40.5 | phase 2 | E2    |
| SARD   | 2016-2018 | 2018                | iperhaline     | >30           | C3 -Sardinian compound                                 | 0109-AT50150-0008    | 0109-AT50150-0008   | 9.788377  | 40.453836 | 1.7    | 0.2   | 0.3  | 51.3 | phase 2 | M     |
| SARD   | 2016-2018 | 2018                | mesohaline     | <30           | C3 -Sardinian compound                                 | 0114-AT50200-0007    | 0114-AT50200-0007   | 9.754533  | 40.590997 | 14.7   | 2.1   | 0.7  | 44.2 | phase 2 | M     |
| SARD   | 2016-2018 | 2018                | euhaline       | >30           | C3 -Sardinian compound                                 | 0115-AT50212-0025    | 0115-AT50212-0025   | 9.739708  | 40.639740 | 14.2   | 1.6   | 0.9  | 56.5 | phase 2 | N2    |

|        |           |      |            |     |                                            |                   |                   |           |           |       |     |     |      |         |    |
|--------|-----------|------|------------|-----|--------------------------------------------|-------------------|-------------------|-----------|-----------|-------|-----|-----|------|---------|----|
| SARD   | 2016-2018 | 2018 | polyhaline | <30 | C3 -Sardinian compound                     | 0123-AT50260-0116 | 0123-AT50260-0116 | 9.666824  | 40.802338 | 8.3   | 0.2 | 0.9 | 48.1 | N1      | N1 |
| SARD   | 2016-2018 | 2018 | euhaline   | >30 | C3 -Sardinian compound                     | 0128-AT50300-0029 | 0128-AT50300-0029 | 9.588236  | 40.897354 | 7.1   | 0.6 | 0.9 | 59.6 | phase 2 | N2 |
| SARD   | 2016-2018 | 2018 | euhaline   | >30 | C3 -Sardinian compound                     | 0129-AT50310-0020 | 0129-AT50310-0020 | 9.555131  | 40.913733 | 2.5   | 0.2 | 1.0 | 71.7 | N1      | N1 |
| SARD   | 2016-2018 | 2018 | euhaline   | >30 | C3 -Sardinian compound                     | 0142-AT50320-0013 | 0142-AT50320-0013 | 9.513115  | 41.008514 | 2.4   | 0.2 | 0.9 | 86.8 | N1      | N1 |
| SARD   | 2016-2018 | 2018 | oligoaline | <30 | C3 -Sardinian compound                     | 0158-AT50330-0009 | 0158-AT50330-0009 | 9.444732  | 41.096177 | 19.2  | 2.7 | 0.0 | 53.7 | phase 2 | M  |
| SARD   | 2016-2018 | 2018 | polyhaline | <30 | C3 -Sardinian compound                     | 0184-AT50360-0032 | 0184-AT50360-0032 | 8.283962  | 40.855193 | 8.7   | 0.4 | 0.3 | 40.0 | phase 2 | E2 |
| SARD   | 2016-2018 | 2018 | polyhaline | <30 | C3 -Sardinian compound                     | 0190-AT50390-0007 | 0190-AT50390-0007 | 8.315173  | 40.588728 | 8.2   | 2.2 | 0.3 | 39.2 | phase 2 | E2 |
| SARD   | 2016-2018 | 2018 | polyhaline | <30 | C3 -Sardinian compound                     | 0190-AT50390-0089 | 0190-AT50390-0089 | 8.289034  | 40.602083 | 15.3  | 3.2 | 0.3 | 35.1 | phase 2 | E2 |
| SARD   | 2016-2018 | 2018 | iperhaline | >30 | C3 -Sardinian compound                     | 0221-AT50490-0049 | 0221-AT50490-0049 | 8.441958  | 39.896021 | 1.7   | 0.2 | 1.0 | 73.1 | N1      | N1 |
| SARD   | 2016-2018 | 2018 | iperhaline | >30 | C3 -Sardinian compound                     | 0221-AT50490-0176 | 0221-AT50490-0176 | 8.471124  | 39.906068 | 5.2   | 0.2 | 0.6 | 63.8 | phase 2 | N2 |
| SARD   | 2016-2018 | 2018 | euhaline   | >30 | C3 -Sardinian compound                     | 0225-AT50500-0037 | 0225-AT50500-0037 | 8.588455  | 39.853399 | 1.4   | 1.1 | 0.9 | 58.2 | phase 2 | N2 |
| SARD   | 2016-2018 | 2018 | polyhaline | <30 | C3 -Sardinian compound                     | 0226-AT50550-0041 | 0226-AT50550-0041 | 8.568143  | 39.822638 | 18.7  | 2.3 | 0.3 | 21.5 | phase 2 | E2 |
| SARD   | 2016-2018 | 2018 | polyhaline | <30 | C3 -Sardinian compound                     | 0226-AT50550-0069 | 0226-AT50550-0069 | 8.575143  | 39.824466 | 26.6  | 2.9 | 0.3 | 26.6 | phase 2 | E2 |
| SARD   | 2016-2018 | 2018 | euhaline   | >30 | C3 -Sardinian compound                     | 0226-AT50570-0012 | 0226-AT50570-0012 | 8.524876  | 39.763183 | 4.2   | 0.8 | 0.7 | 51.2 | phase 2 | N2 |
| SARD   | 2016-2018 | 2018 | euhaline   | >30 | C3 -Sardinian compound                     | 0226-AT50580-0002 | 0226-AT50580-0002 | 8.520291  | 39.749095 | 4.5   | 0.9 | 1.0 | 67.3 | phase 2 | N2 |
| SARD   | 2016-2018 | 2018 | euhaline   | >30 | C3 -Sardinian compound                     | 0226-AT50590-0004 | 0226-AT50590-0004 | 8.510152  | 39.726054 | 10.4  | 1.0 | 0.6 | 30.8 | phase 2 | E2 |
| SARD   | 2016-2018 | 2018 | polyhaline | <30 | C3 -Sardinian compound                     | 0226-AT50600-0097 | 0226-AT50600-0097 | 8.531286  | 39.699179 | 30.9  | 3.6 | 0.3 | 26.0 | phase 2 | E2 |
| SARD   | 2016-2018 | 2018 | mesohaline | <30 | C3 -Sardinian compound                     | 0226-AT50610-0202 | 0226-AT50610-0202 | 8.546620  | 39.703371 | 41.0  | 4.9 | 0.4 | 20.3 | phase 2 | E2 |
| SARD   | 2016-2018 | 2018 | euhaline   | >30 | C3 -Sardinian compound                     | 0252-AT50650-0146 | 0252-AT50650-0146 | 8.414811  | 39.169315 | 4.5   | 0.2 | 0.9 | 70.1 | N1      | N1 |
| SARD   | 2016-2018 | 2018 | iperhaline | >30 | C3 -Sardinian compound                     | 0257-AT50740-0120 | 0257-AT50740-0120 | 8.577684  | 39.033951 | 14.2  | 0.2 | 0.7 | 66.2 | N1      | N1 |
| SARD   | 2016-2018 | 2018 | iperhaline | >30 | C3 -Sardinian compound                     | 0258-AT50760-0007 | 0258-AT50760-0007 | 8.624294  | 38.959316 | 1.6   | 0.2 | 0.6 | 61.9 | phase 2 | N2 |
| SARD   | 2016-2018 | 2018 | iperhaline | >30 | C3 -Sardinian compound                     | 0259-AT50780-0010 | 0259-AT50780-0010 | 8.618552  | 38.953891 | 13.2  | 0.3 | 0.7 | 57.9 | N1      | N1 |
| SARD   | 2016-2018 | 2018 | euhaline   | >30 | C3 -Sardinian compound                     | 0287-AT50830-0009 | 0287-AT50830-0009 | 9.002867  | 38.987856 | 5.6   | 0.4 | 0.9 | 68.7 | N1      | N1 |
| SARD   | 2016-2018 | 2018 | euhaline   | >30 | C3 -Sardinian compound                     | 0287-AT50830-0032 | 0287-AT50830-0032 | 9.008641  | 38.989658 | 6.3   | 0.6 | 0.9 | 73.2 | phase 2 | N2 |
| SARD   | 2016-2018 | 2018 | euhaline   | >30 | C3 -Sardinian compound                     | 0301-AT50870-0047 | 0301-AT50870-0047 | 9.019080  | 39.166277 | 76.4  | 0.3 | 0.3 | 27.6 | phase 2 | E2 |
| VENETO | 2014-2016 | 2015 | polyhaline | <30 | C1 - Northern Adriatic Sea - Caleri        | 210               | 213               | 12.327935 | 45.071302 | 26.2  | 0.2 | 0.3 | 46.6 | phase 2 | E2 |
| VENETO | 2014-2016 | 2015 | polyhaline | <30 | C1 - Northern Adriatic Sea - Caleri        | 220               | 223               | 12.316546 | 45.089359 | 15.5  | 0.2 | 0.3 | 55.7 | phase 2 | M  |
| VENETO | 2014-2016 | 2015 | euhaline   | >30 | C1 - Northern Adriatic Sea - Marinetta     | 230               | 233               | 12.369878 | 45.056849 | 110.3 | 0.8 | 0.4 | 50.4 | phase 2 | E1 |
| VENETO | 2014-2016 | 2015 | polyhaline | <30 | C1 - Northern Adriatic Sea - Vallona       | 240               | 243               | 12.378541 | 45.039323 | 88.5  | 0.7 | 0.4 | 41.4 | phase 2 | E2 |
| VENETO | 2014-2016 | 2015 | polyhaline | <30 | C1 - Northern Adriatic Sea - Vallona       | 250               | 253               | 12.376807 | 45.047538 | 82.7  | 0.7 | 0.4 | 38.8 | phase 2 | E2 |
| VENETO | 2014-2016 | 2015 | polyhaline | <30 | C1 - Northern Adriatic Sea - Barbamarco    | 260               | 263               | 12.448925 | 45.001444 | 34.2  | 0.4 | 0.4 | 47.5 | phase 2 | E2 |
| VENETO | 2014-2016 | 2015 | polyhaline | <30 | C1 - Northern Adriatic Sea - Barbamarco    | 270               | 273               | 12.478816 | 44.982974 | 53.7  | 0.7 | 0.4 | 51.5 | phase 2 | M  |
| VENETO | 2014-2016 | 2015 | polyhaline | <30 | C1 - Northern Adriatic Sea - Canarin       | 290               | 293               | 12.494596 | 44.905363 | 63.8  | 0.7 | 0.4 | 56.7 | phase 2 | M  |
| VENETO | 2014-2016 | 2015 | polyhaline | <30 | C1 - Northern Adriatic Sea - Scardovari    | 320               | 323               | 12.436884 | 44.844441 | 22.3  | 0.2 | 0.4 | 69.6 | phase 2 | M  |
| VENETO | 2014-2016 | 2015 | polyhaline | <30 | C1 - Northern Adriatic Sea - Scardovari    | 330               | 333               | 12.414772 | 44.836399 | 20.1  | 0.3 | 0.3 | 62.4 | phase 2 | M  |
| VENETO | 2014-2016 | 2015 | polyhaline | <30 | C1 - Northern Adriatic Sea - Scardovari    | 340               | 343               | 12.401418 | 44.866903 | 15.3  | 0.3 | 0.4 | 46.2 | phase 2 | E2 |
| VENETO | 2014-2016 | 2015 | polyhaline | <30 | C1 - Northern Adriatic Sea - Caorle        | 380               | 383               | 12.908542 | 45.620550 | 76.4  | 0.4 | 0.2 | 60.1 | phase 2 | M  |
| VENETO | 2014-2016 | 2015 | polyhaline | <30 | C1 - Northern Adriatic Sea - Baseleghe     | 390               | 393               | 12.985749 | 45.628822 | 47.1  | 0.3 | 0.6 | 76.4 | E1      | N2 |
| VENETO | 2014-2016 | 2015 | polyhaline | <30 | C1 - Northern Adriatic Sea - Caleri        | 400               | 403               | 12.304750 | 45.105667 | 8.0   | 0.2 | 0.4 | 51.6 | phase 2 | M  |
| VENETO | 2014-2016 | 2015 | euhaline   | >30 | C1 - Northern Adriatic Sea - Marinetta     | 410               | 413               | 12.358850 | 45.064700 | 60.0  | 0.5 | 0.3 | 67.1 | phase 2 | M  |
| VENETO | 2014-2016 | 2015 | polyhaline | <30 | C1 - Northern Adriatic Sea - Canarin       | 430               | 433               | 12.497583 | 44.934966 | 36.6  | 0.5 | 0.4 | 39.2 | phase 2 | E2 |
| VENETO | 2014-2016 | 2015 | polyhaline | <30 | C1 - Northern Adriatic Sea - Canarin       | 440               | 443               | 12.493467 | 44.921482 | 50.8  | 0.6 | 0.4 | 42.0 | phase 2 | E2 |
| VENETO | 2014-2016 | 2015 | polyhaline | <30 | C1 - Northern Adriatic Sea - Scardovari    | 450               | 453               | 12.426084 | 44.886249 | 17.2  | 0.2 | 0.4 | 50.7 | phase 2 | M  |
| VENETO | 2014-2016 | 2015 | euhaline   | >30 | C1 - Northern Adriatic Sea - Venice lagoon | EC_1              | EC_1              | 12.502244 | 45.555656 | 7.0   | 0.1 | 0.9 | 64.9 | N1      | N1 |
| VENETO | 2014-2016 | 2015 | euhaline   | >30 | C1 - Northern Adriatic Sea - Venice lagoon | EC_2              | EC_2              | 12.505893 | 45.522990 | 5.2   | 0.1 | 0.7 | 55.3 | N1      | N1 |
| VENETO | 2014-2016 | 2015 | euhaline   | >30 | C1 - Northern Adriatic Sea - Venice lagoon | EC_Ve-8           | EC_Ve8            | 12.487663 | 45.505353 | 8.8   | 0.1 | 0.8 | 77.7 | N1      | N1 |
| VENETO | 2014-2016 | 2015 | euhaline   | >30 | C1 - Northern Adriatic Sea - Venice lagoon | ENC1_1            | ENC1_1            | 12.312694 | 45.321282 | 5.2   | 0.1 | 1.0 | 75.6 | N1      | N1 |
| VENETO | 2014-2016 | 2015 | euhaline   | >30 | C1 - Northern Adriatic Sea - Venice lagoon | ENC1_2            | ENC1_2            | 12.270906 | 45.240754 | 7.9   | 0.1 | 1.0 | 74.8 | N1      | N1 |
| VENETO | 2014-2016 | 2015 | euhaline   | >30 | C1 - Northern Adriatic Sea - Venice lagoon | ENC1_3            | ENC1_3            | 12.222054 | 45.232446 | 12.7  | 0.1 | 0.4 | 49.6 | phase 2 | E2 |
| VENETO | 2014-2016 | 2015 | euhaline   | >30 | C1 - Northern Adriatic Sea - Venice lagoon | ENC1_4            | ENC1_4            | 12.236763 | 45.331774 | 8.9   | 0.2 | 1.0 | 77.3 | N1      | N1 |
| VENETO | 2014-2016 | 2015 | euhaline   | >30 | C1 - Northern Adriatic Sea - Venice lagoon | ENC1_FI           | ENC1_FI           | 12.289033 | 45.351588 | 8.9   | 0.1 | 0.9 | 95.3 | N1      | N1 |
| VENETO | 2014-2016 | 2015 | euhaline   | >30 | C1 - Northern Adriatic Sea - Venice lagoon | ENC1_VS           | ENC1_VS           | 12.265887 | 45.278170 | 10.1  | 0.1 | 0.9 | 75.1 | N1      | N1 |
| VENETO | 2014-2016 | 2015 | euhaline   | >30 | C1 - Northern Adriatic Sea - Venice lagoon | ENC2_1            | ENC2_2            | 12.408691 | 45.442372 | 10.7  | 0.2 | 0.9 | 77.1 | N1      | N1 |
| VENETO | 2014-2016 | 2015 | euhaline   | >30 | C1 - Northern Adriatic Sea - Venice lagoon | ENC2_VG           | ENC2_VG           | 12.373993 | 45.453839 | 11.0  | 0.2 | 0.6 | 57.2 | phase 2 | N2 |
| VENETO | 2014-2016 | 2015 | euhaline   | >30 | C1 - Northern Adriatic Sea - Venice lagoon | ENC3_CH           | ENC3_CH           | 12.288088 | 45.222413 | 15.9  | 0.3 | 0.7 | 47.8 | N1      | N1 |
| VENETO | 2014-2016 | 2015 | euhaline   | >30 | C1 - Northern Adriatic Sea - Venice lagoon | ENC4_1            | ENC4_2            | 12.352199 | 45.406313 | 10.1  | 0.1 | 0.3 | 51.6 | phase 2 | M  |
| VENETO | 2014-2016 | 2015 | euhaline   | >30 | C1 - Northern Adriatic Sea - Venice lagoon | ENC4_Ve-6         | ENC4_Ve-6         | 12.324031 | 45.403163 | 8.6   | 0.1 | 0.6 | 56.1 | phase 2 | N2 |
| VENETO | 2014-2016 | 2015 | polyhaline | <30 | C1 - Northern Adriatic Sea - Venice lagoon | PC1_1             | PC1_2             | 12.447411 | 45.498691 | 14.5  | 0.1 | 0.3 | 55.8 | phase 2 | M  |
| VENETO | 2014-2016 | 2015 | polyhaline | <30 | C1 - Northern Adriatic Sea - Venice lagoon | PC1_1B            | PC1_1B            | 12.397735 | 45.508443 | 50.3  | 0.4 | 0.4 | 42.2 | phase 2 | E2 |
| VENETO | 2014-2016 | 2015 | polyhaline | <30 | C1 - Northern Adriatic Sea - Venice lagoon | PC1_2             | PC1_3             | 12.454862 | 45.540109 | 15.3  | 0.2 | 0.3 | 54.7 | phase 2 | M  |
| VENETO | 2014-2016 | 2015 | polyhaline | <30 | C1 - Northern Adriatic Sea - Venice lagoon | PC2_1             | PC2_1             | 12.185169 | 45.291294 | 10.5  | 0.2 | 0.3 | 51.4 | phase 2 | M  |

|        |           |      |            |     |                                           |           |           |           |           |      |     |     |      |         |    |
|--------|-----------|------|------------|-----|-------------------------------------------|-----------|-----------|-----------|-----------|------|-----|-----|------|---------|----|
| VENETO | 2014-2016 | 2015 | polyhaline | <30 | C1 - Northern Adriatic Sea -Venice lagoon | PC2_16    | PC2_16    | 12.197379 | 45.327393 | 14.9 | 0.2 | 0.6 | 51.8 | phase 2 | N2 |
| VENETO | 2014-2016 | 2015 | polyhaline | <30 | C1 - Northern Adriatic Sea -Venice lagoon | PC2_CC    | PC2_CC    | 12.194523 | 45.351636 | 21.6 | 0.2 | 0.3 | 48.9 | phase 2 | E2 |
| VENETO | 2014-2016 | 2015 | polyhaline | <30 | C1 - Northern Adriatic Sea -Venice lagoon | PC3_VDB   | PC3_VDB   | 12.249130 | 45.193270 | 32.8 | 0.2 | 0.3 | 44.7 | phase 2 | E2 |
| VENETO | 2014-2016 | 2015 | polyhaline | <30 | C1 - Northern Adriatic Sea -Venice lagoon | PC4_10B   | PC4_10B   | 12.209058 | 45.403884 | 39.6 | 0.5 | 0.4 | 39.3 | phase 2 | E2 |
| VENETO | 2014-2016 | 2015 | polyhaline | <30 | C1 - Northern Adriatic Sea -Venice lagoon | PNC1_1    | PNC1_2    | 12.332431 | 45.462722 | 21.3 | 0.3 | 0.4 | 45.0 | phase 2 | E2 |
| VENETO | 2014-2016 | 2015 | polyhaline | <30 | C1 - Northern Adriatic Sea -Venice lagoon | PNC1_7B   | PNC1_7B   | 12.292479 | 45.463348 | 26.3 | 0.6 | 0.4 | 32.3 | phase 2 | E2 |
| VENETO | 2014-2016 | 2015 | polyhaline | <30 | C1 - Northern Adriatic Sea -Venice lagoon | PNC1_Ve-1 | PNC1_Ve-2 | 12.273928 | 45.413805 | 16.5 | 0.3 | 0.4 | 50.2 | phase 2 | M  |
| VENETO | 2014-2016 | 2015 | polyhaline | <30 | C1 - Northern Adriatic Sea -Venice lagoon | PNC2_1    | PNC2_1    | 12.418918 | 45.481650 | 16.7 | 0.2 | 0.3 | 46.4 | phase 2 | E2 |
| VENETO | 2014-2016 | 2015 | polyhaline | <30 | C1 - Northern Adriatic Sea -Venice lagoon | PNC2_2    | PNC2_2    | 12.382685 | 45.500070 | 51.0 | 0.5 | 0.4 | 36.8 | phase 2 | E2 |
| VENETO | 2014-2016 | 2015 | polyhaline | <30 | C1 - Northern Adriatic Sea -Venice lagoon | PNC2_SG   | PNC2_SG   | 12.389555 | 45.470506 | 13.0 | 0.2 | 0.6 | 66.1 | phase 2 | N2 |
